# Supplementary material
Source: PubMed Central journal article supplement (PMC3950322)

**a**

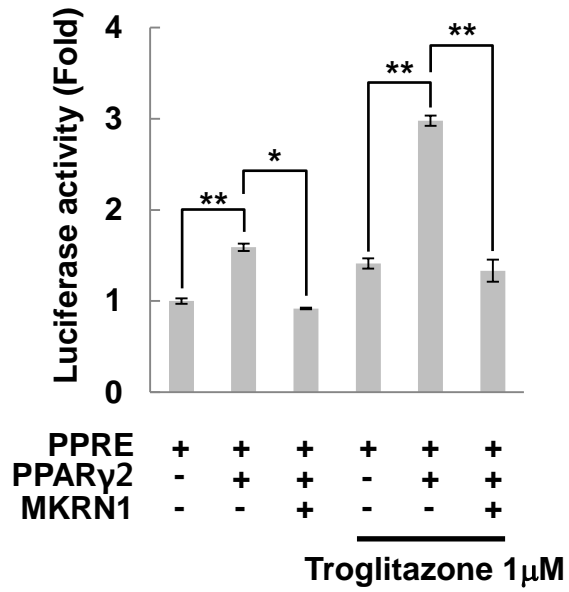

**b**

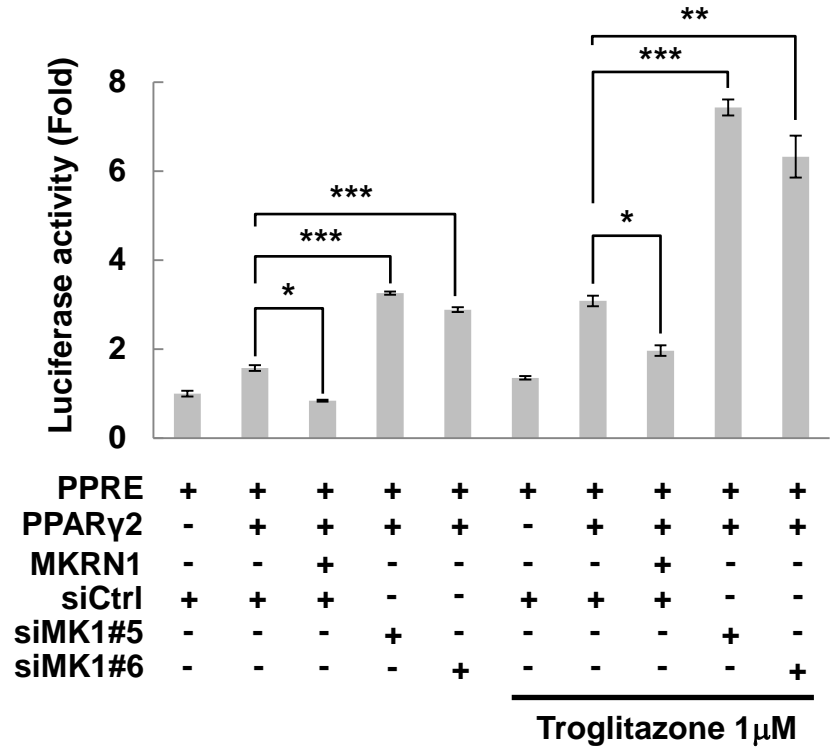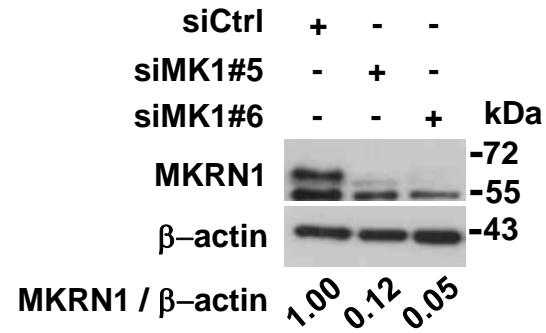

**a**

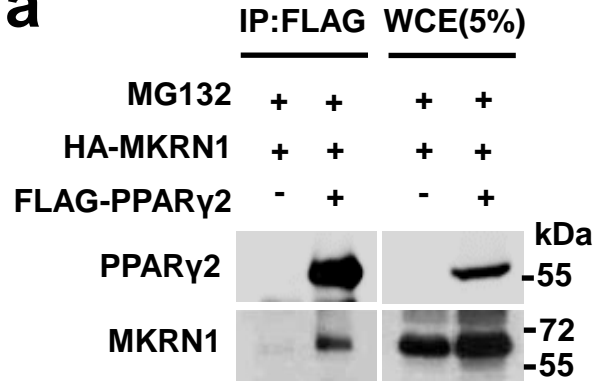

**b**

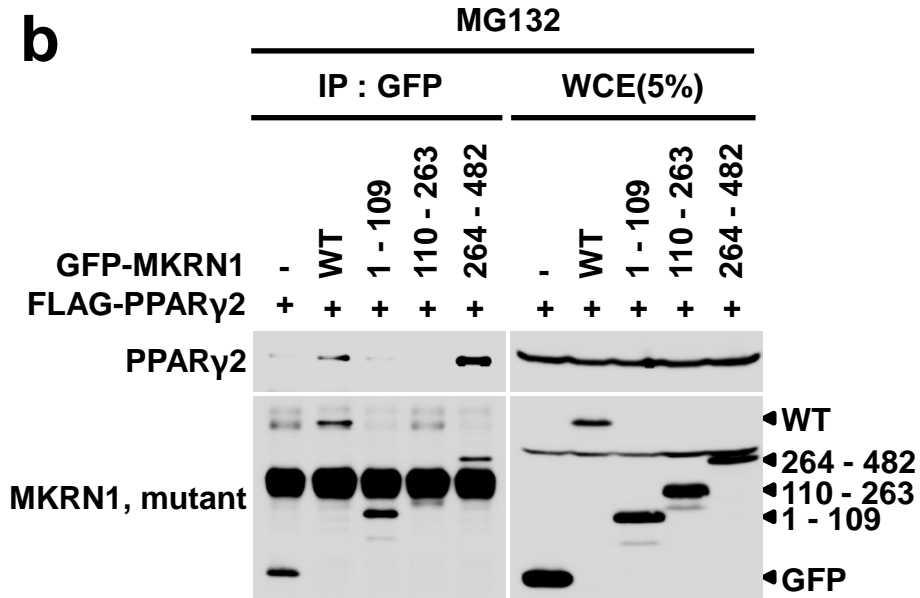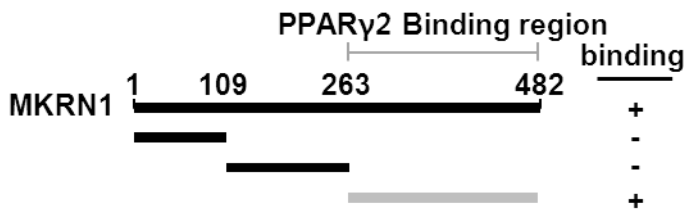

**c**

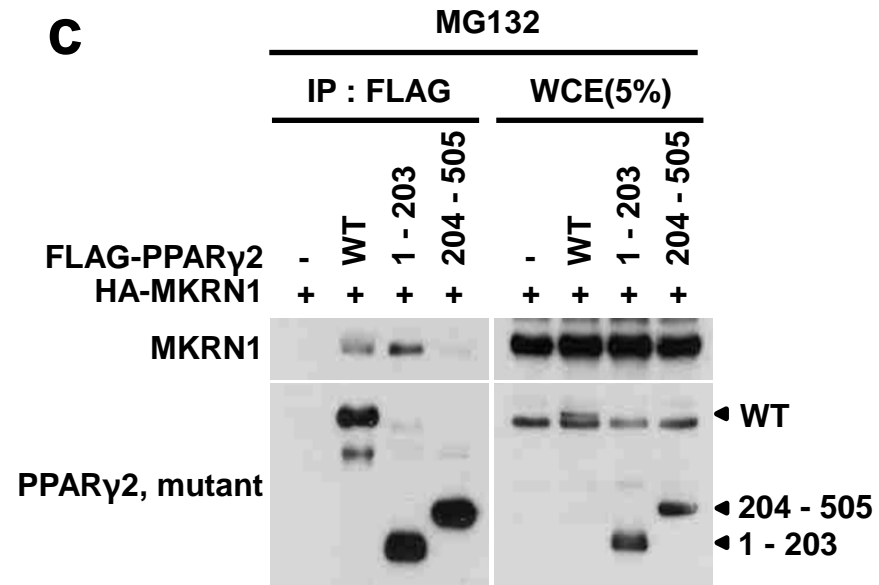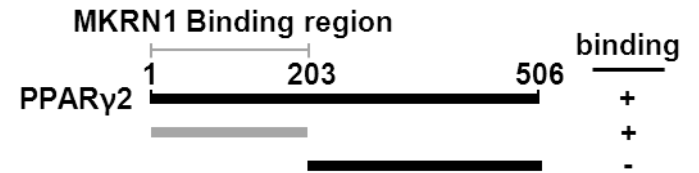

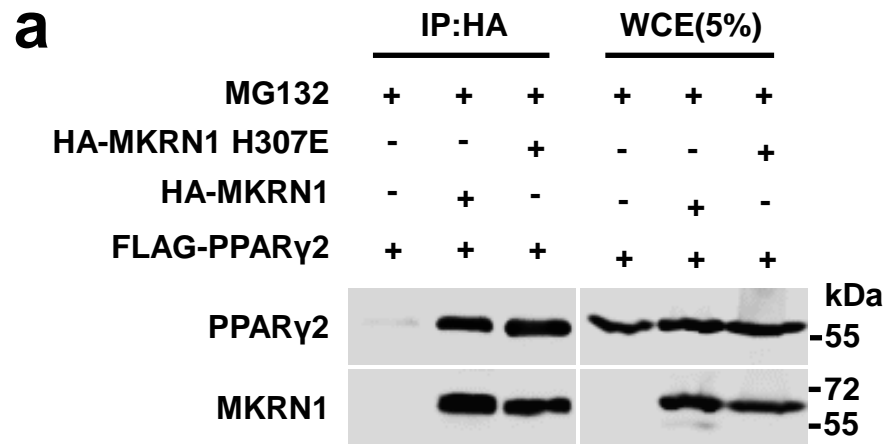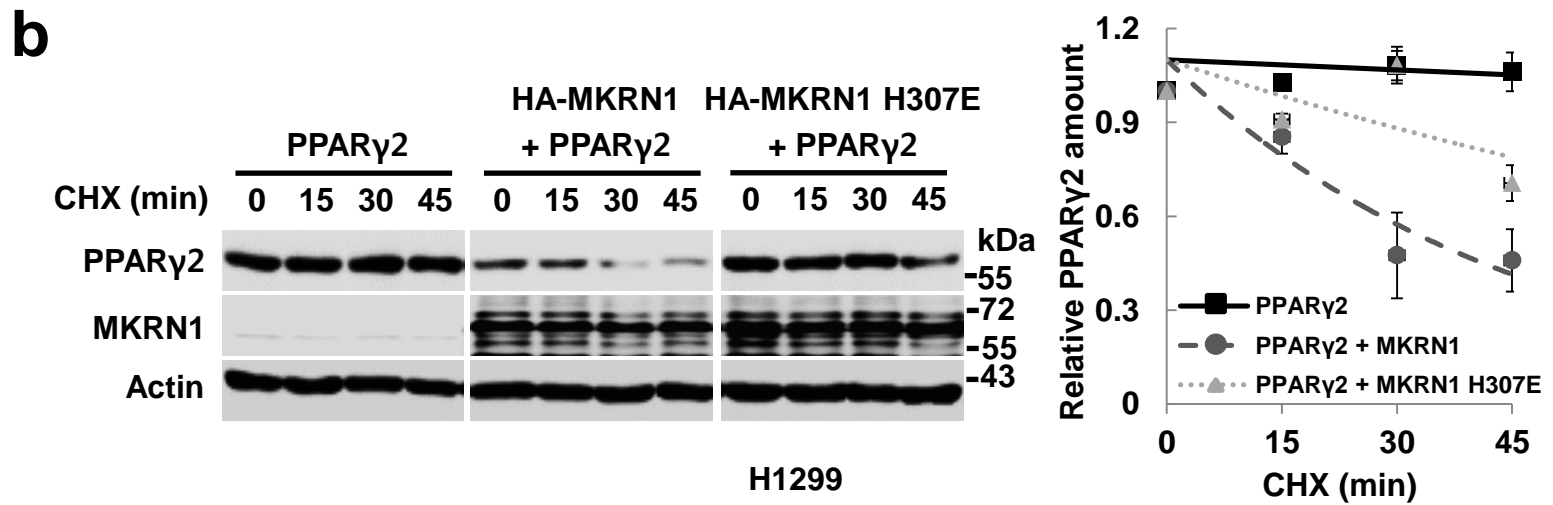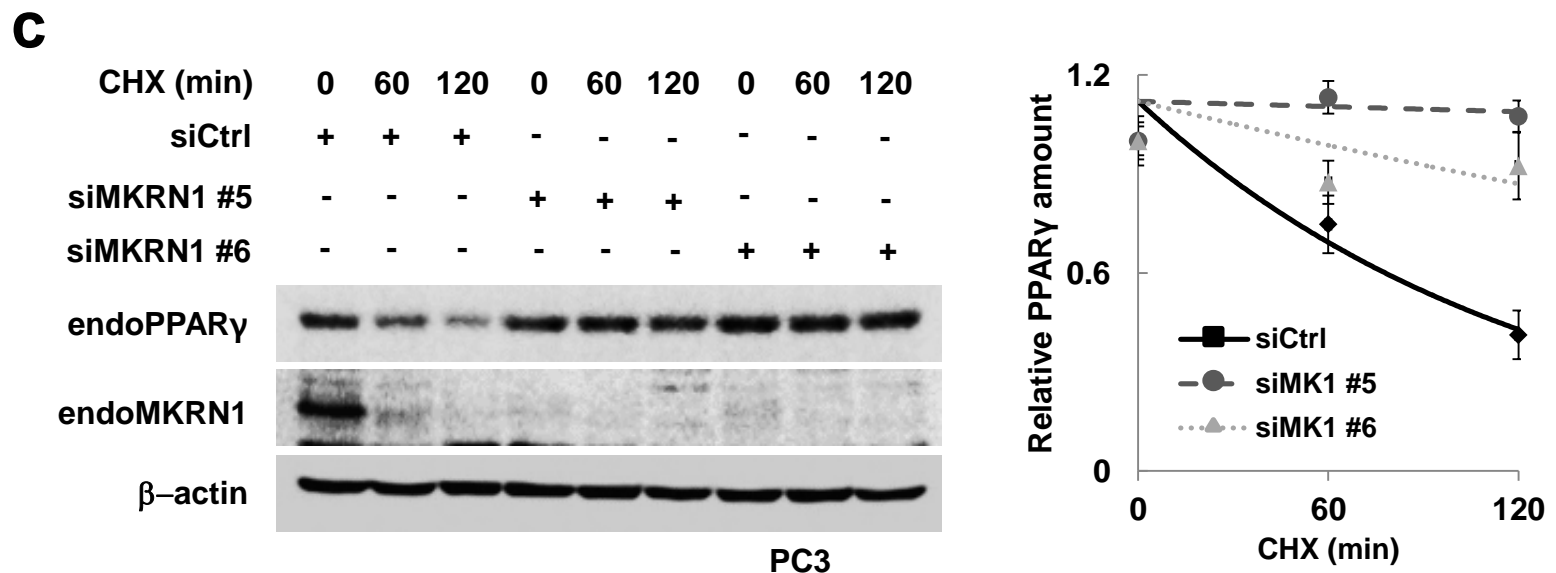

**a**

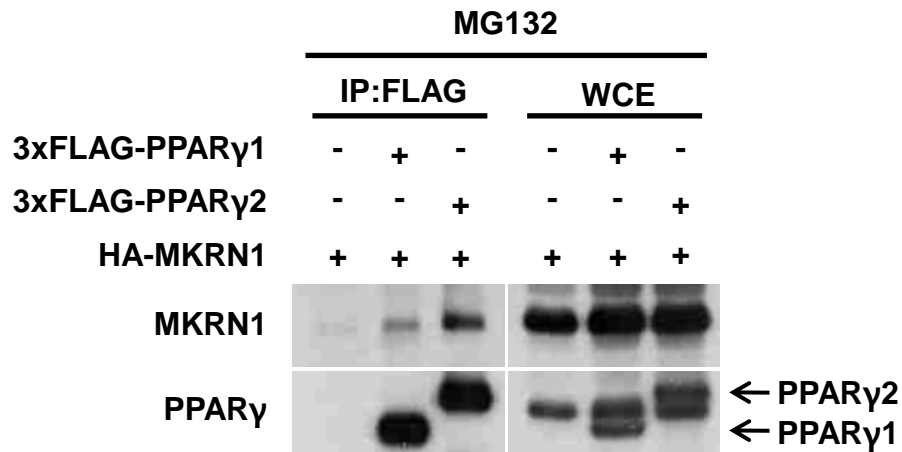

**b**

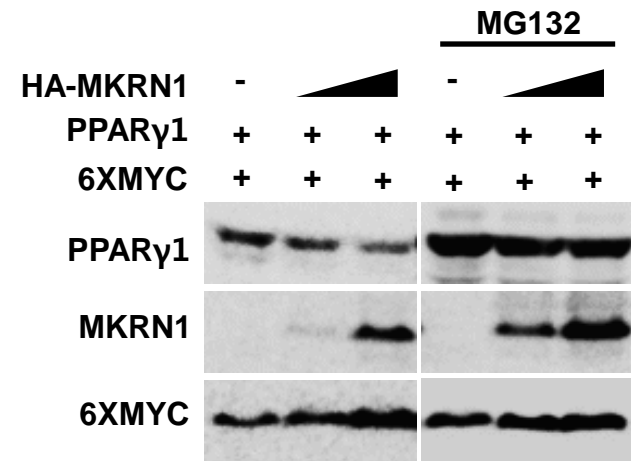

**c**

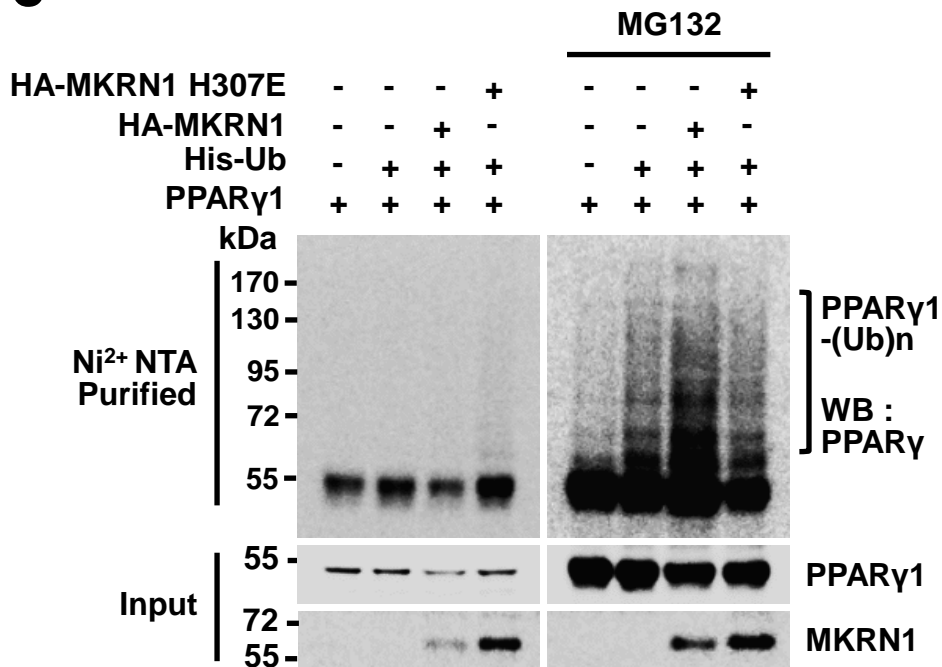

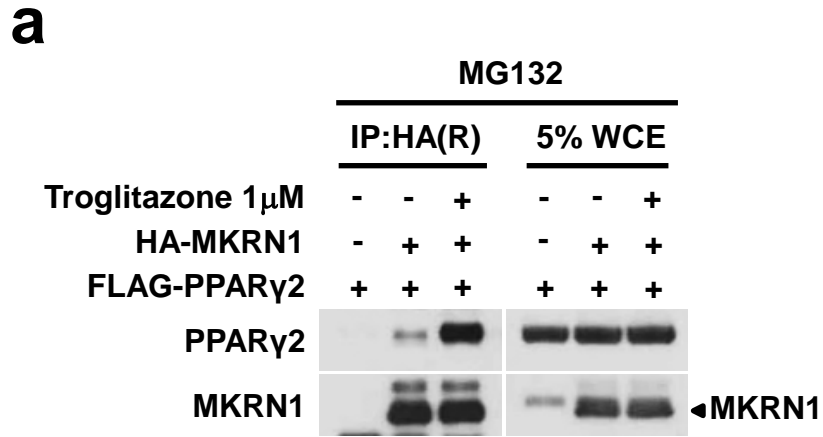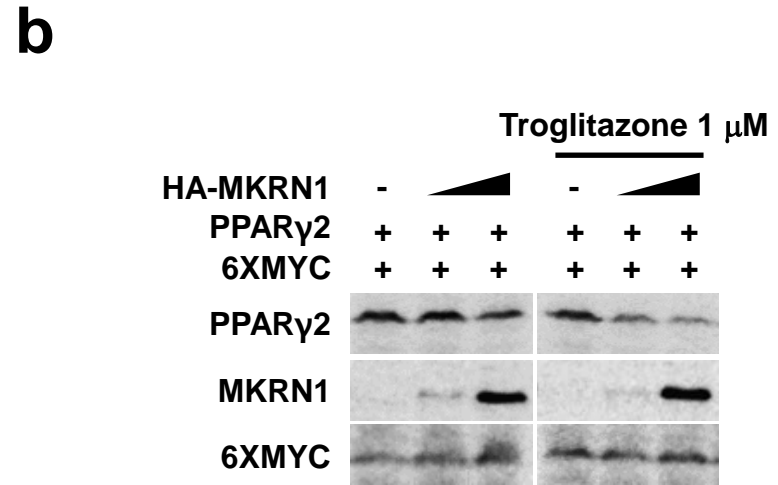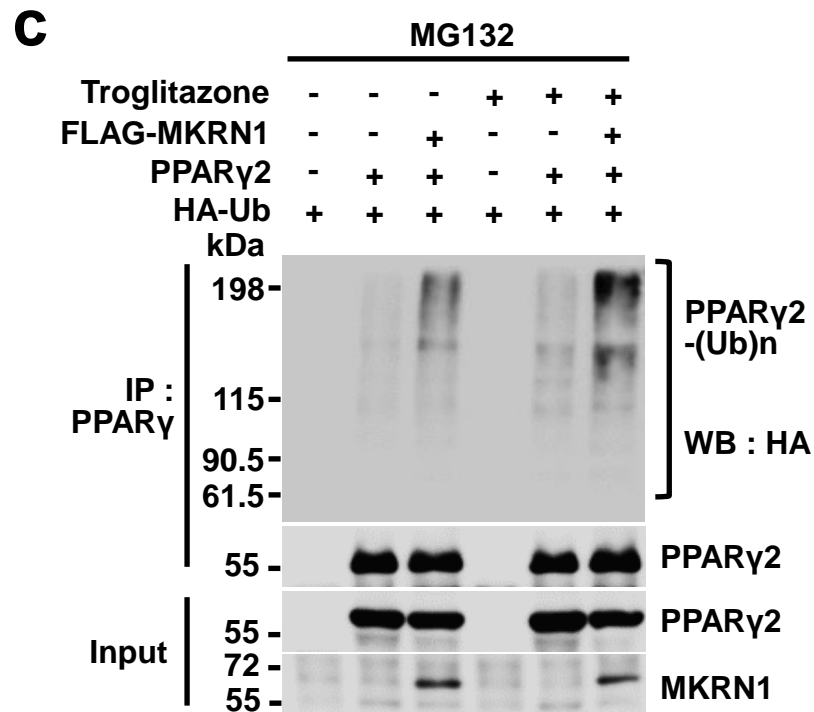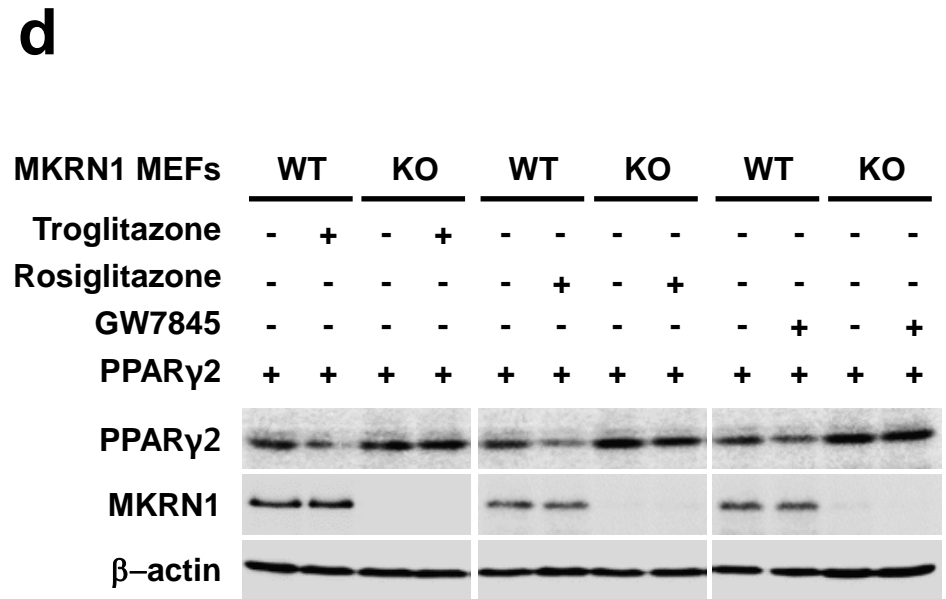

**a**

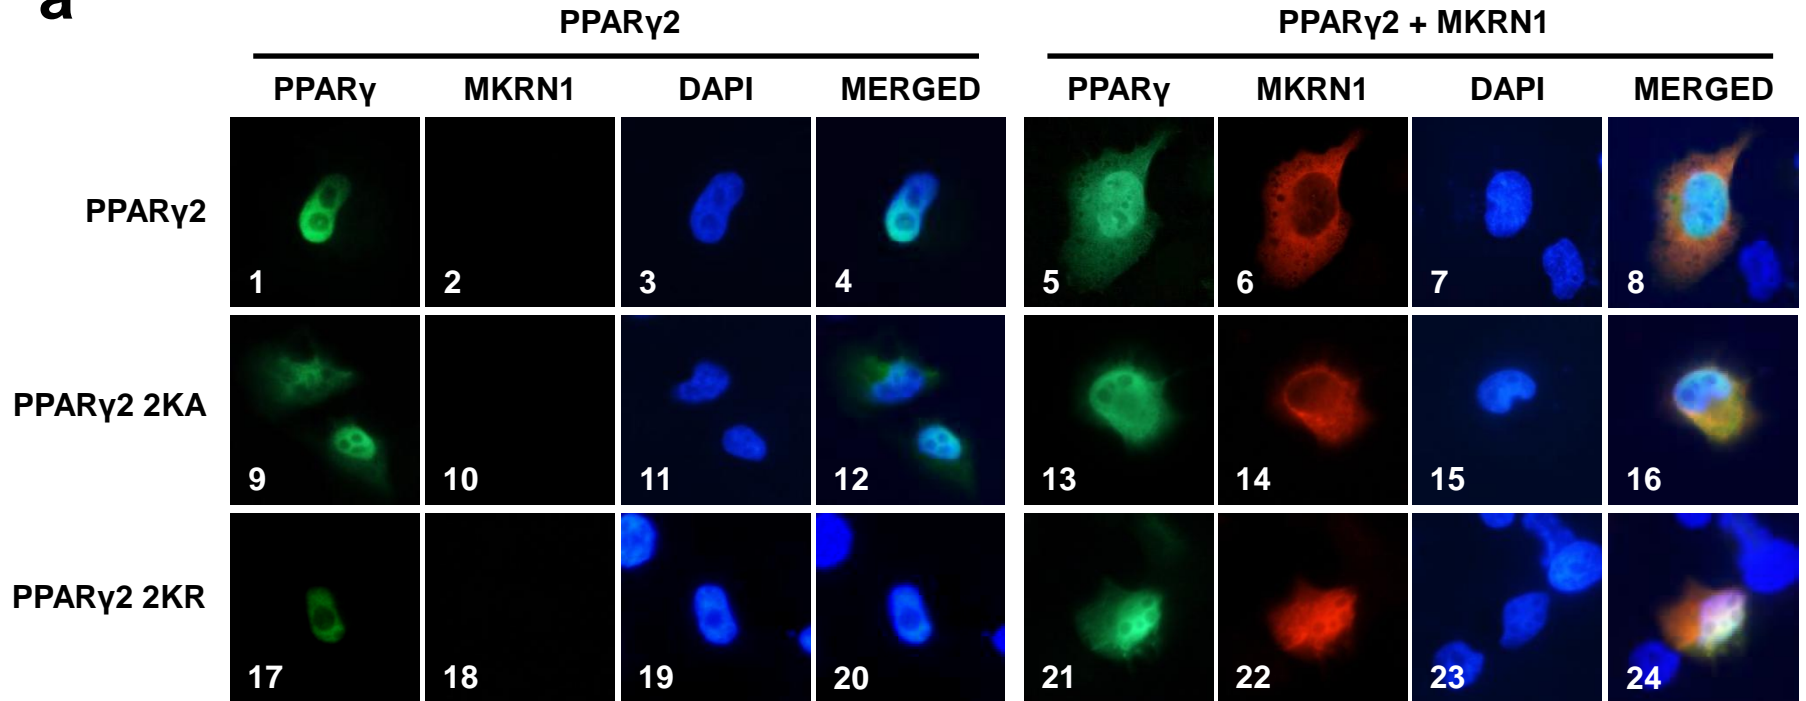

**b**

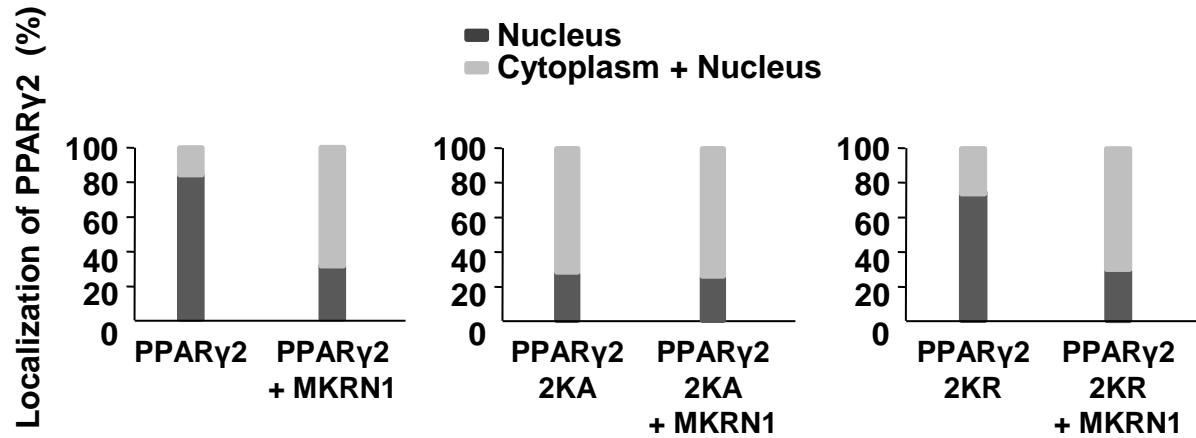

**a**

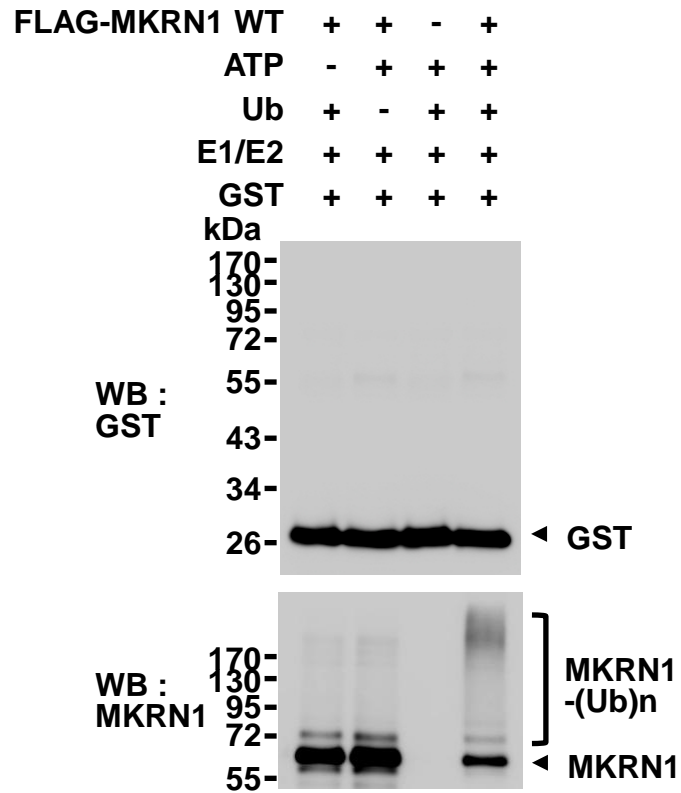

**b**

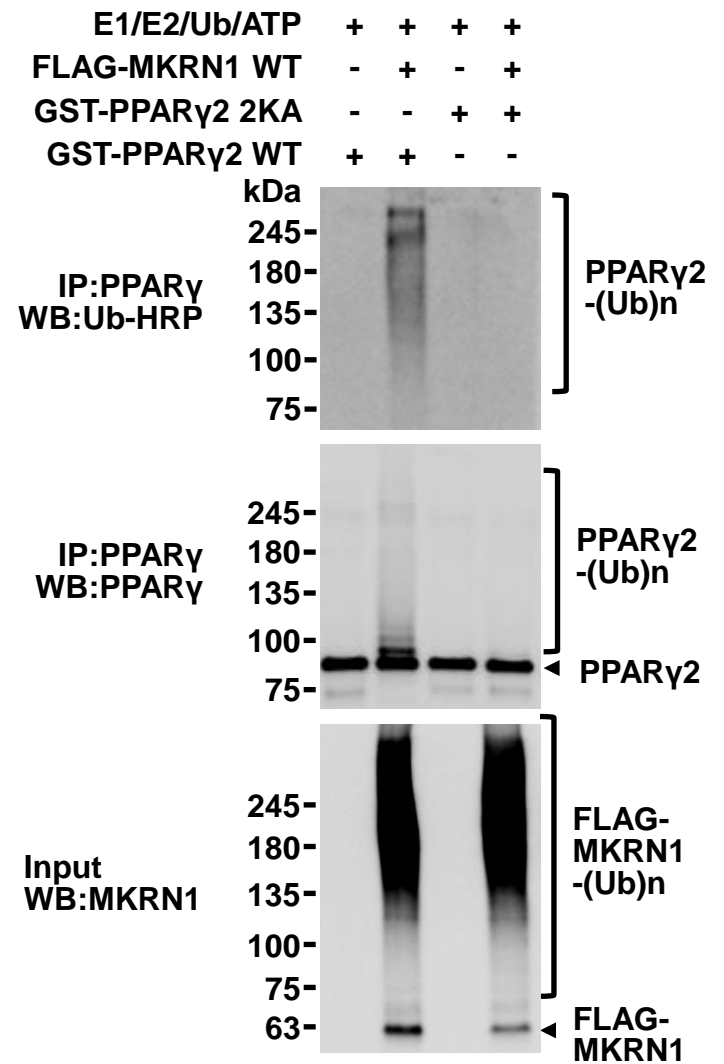

**a**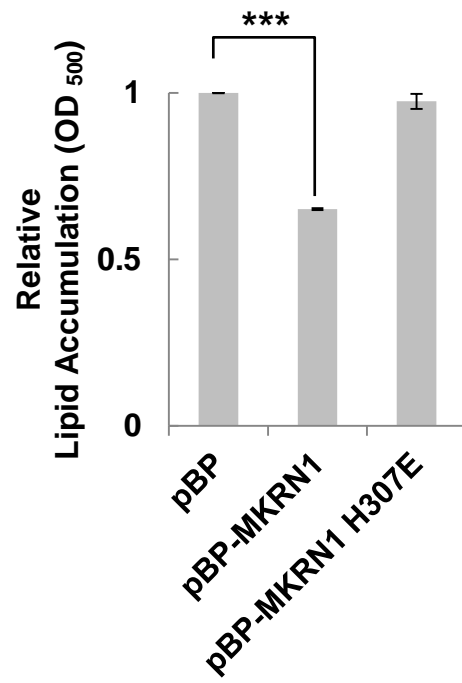**b**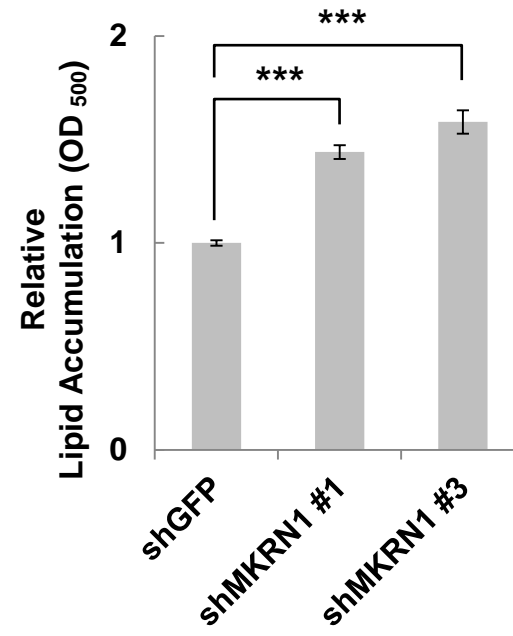



**a**

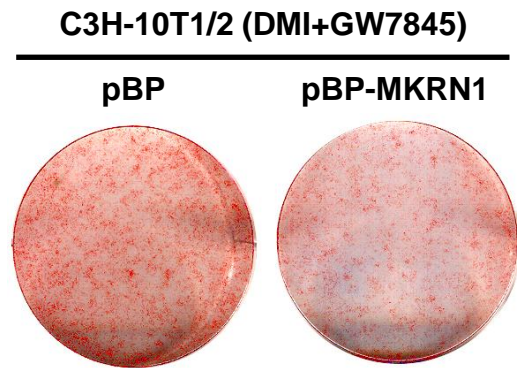

**b**

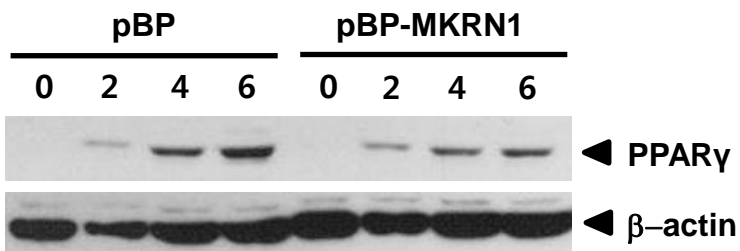

**c**

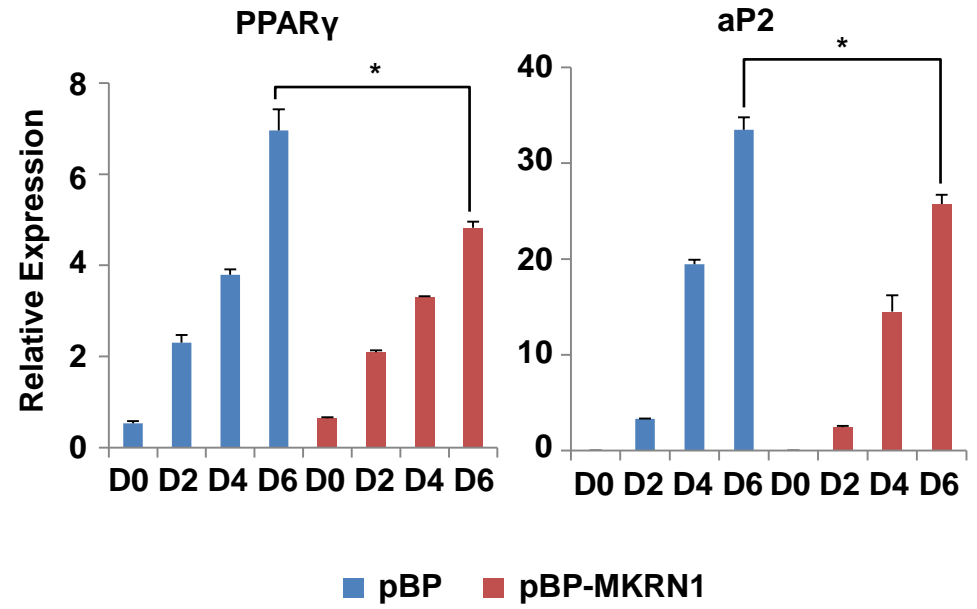

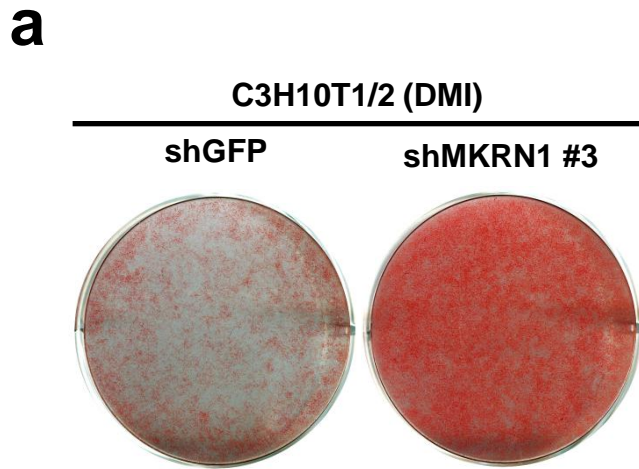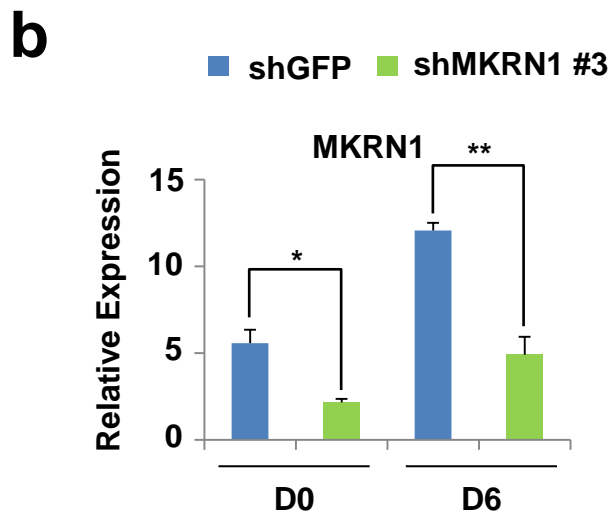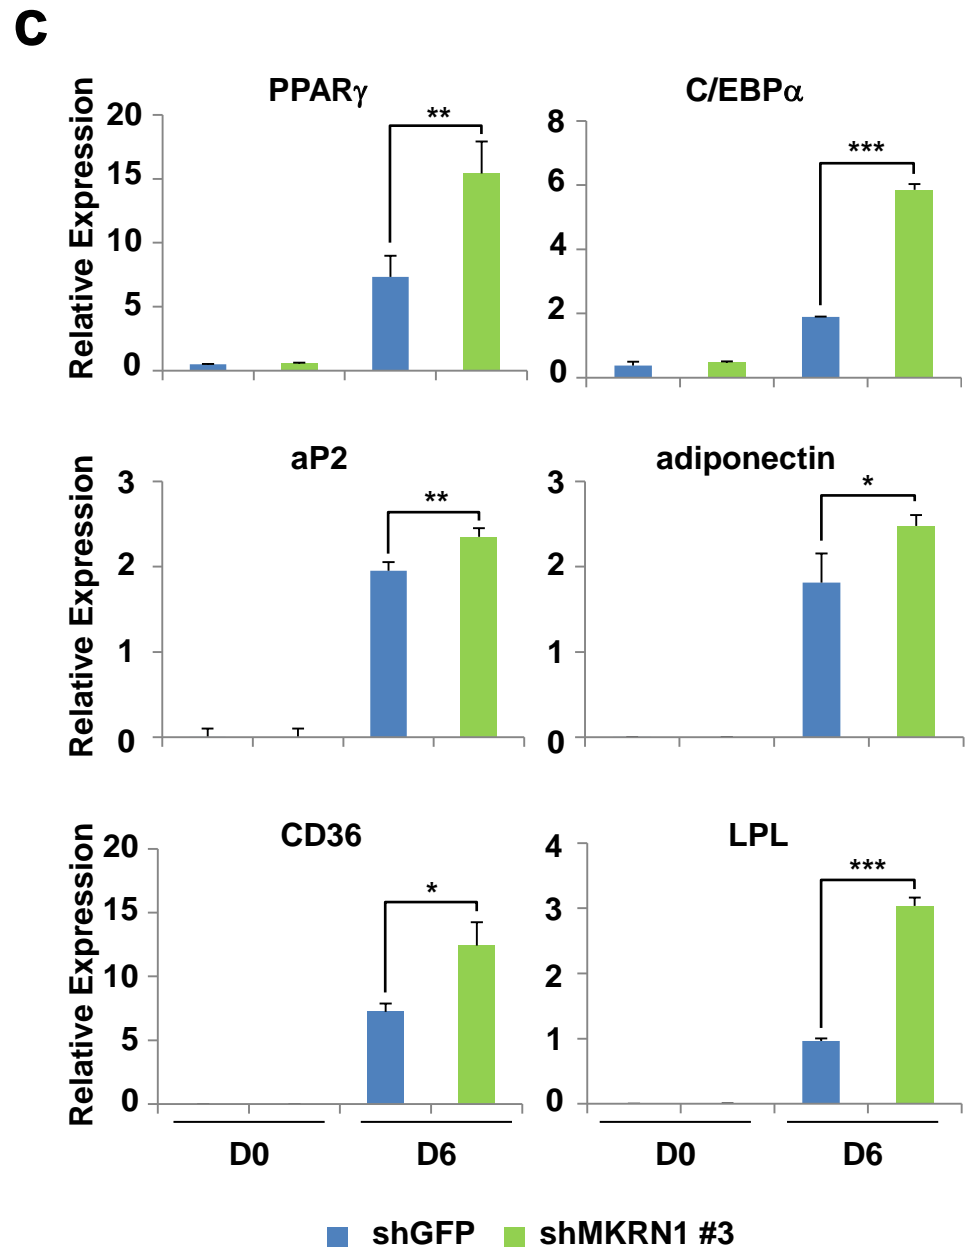

Supplement: cdd2013181x1.pdf [file cdd2013181x1.pdf]
